# Supplementary material for: Novel magnetic antimicrobial nanocomposites for bone tissue engineering applications
Source: Royal Society of Chemistry journal article supplement (doi:10.1039/c5ra02413g), 2015-01-01

## **Novel Magnetic Antimicrobial Nanocomposites for Bone Tissue Engineering Applications**

Arundhati Bhowmick, Arijit Saha, Nilkamal Pramanik, Subhash Banerjee, Manas Das, and Patit

Paban Kundu

### **Supplementary Information**

#### **Preparation procedure of control sample (BMM-IC)**

For the synthesis of BMM IC, 55 wt % CTS (dissolved in 15 ml 100 % formic acid) and 40 wt % of PMMA-*co*-PHEMA were blended using a mechanical stirrer. After that 5 wt % of nano-HAP (in absence of 5 wt % nano-Fe<sub>3</sub>O<sub>4</sub>) was added drop by drop to the resulting mixture with constant stirring and stirred vigorously for overnight to obtain a homogeneous mixture. The resulting mixture was then transferred to polystyrene petri-dishes. Upon evaporation of formic acid at room temperature, film was obtained, which was dried at 60°C for 48 h.

# FTIR spectrum of control sample (BMM-IC)

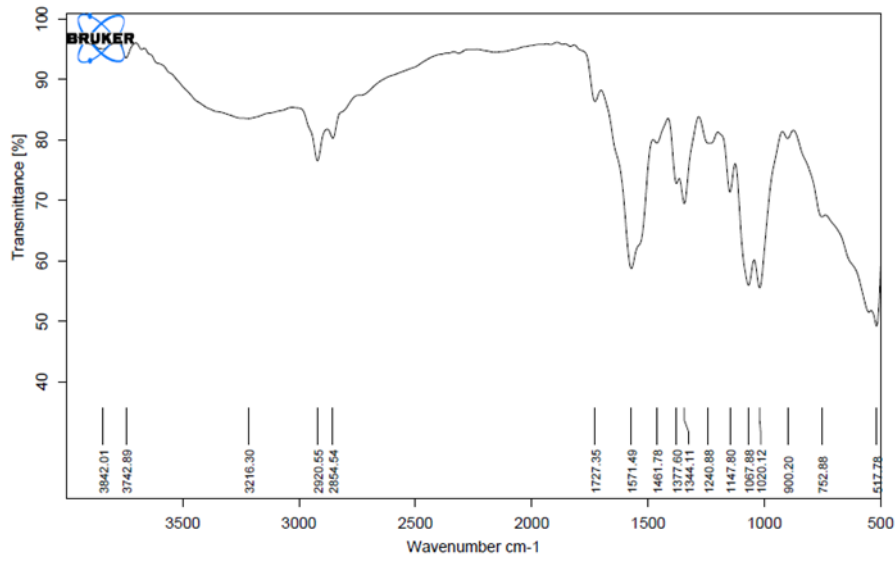

### XRD spectrum of control sample (BMM-IC)

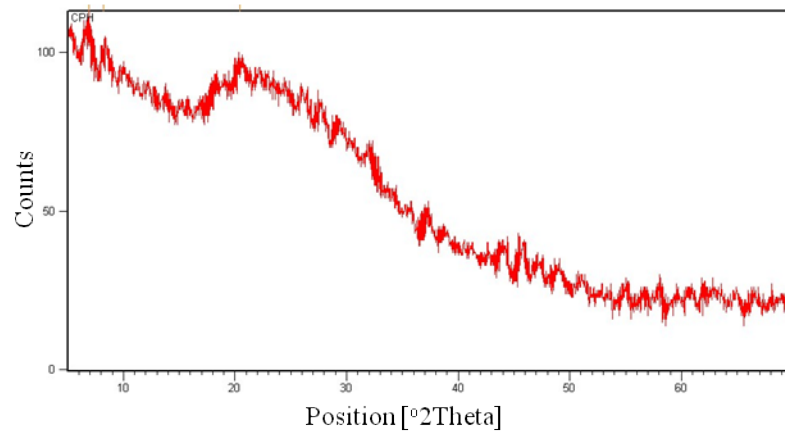

Supplement: c5ra02413g1.pdf [file c5ra02413g1.pdf]
